# Supplementary material for: Novel Enrofloxacin Schiff Base Metal Complexes: Synthesis, Spectroscopic Characterization, Computational Simulation and Antimicrobial Investigation against Some Food and Phyto-Pathogens
Source: MDPI journal article supplement (doi:10.3390/inorganics10110177), 2022-10-25
Supplement: s1 [file s1]

## Supplementary Materials

### **Novel Enrofloxacin Schiff base metal complexes: Synthesis, spectroscopic characterization, computational simulation and antimicrobial investigation against some food and phyto-pathogens**

Amira A. Mohamed<sup>1</sup>, Fatma M. Ahmed<sup>2</sup>, Wael A. Zordok<sup>3</sup>, Walaa H. El-Shwiniy<sup>3,4</sup>, Sadeek A. Sadeek<sup>3</sup>, Hazem S. Elshafie<sup>5,\*</sup>

1. Department of Basic Science, Zagazig Higher Institute of Engineering and Technology, Zagazig 44519, Egypt
2. Regional Joint Laboratory, Directorate of Health Affairs, Zagazig 44519, Egypt
3. Department of Chemistry, Faculty of Science, Zagazig University, Zagazig 44519, Egypt
4. Department of Chemistry, College of Science, University of Bisha, Bisha 61922, Saudi Arabia
5. School of Agricultural, Forestry, Food and Environmental Sciences, University of Basilicata, Viale dell'Ateneo Lucano, Potenza 85100, Italy.

\* Correspondence: hazem.elshafie@unibas.it (H.S.E.); Tel.: +39-0971-205522; Fax: +39-0971-205503.

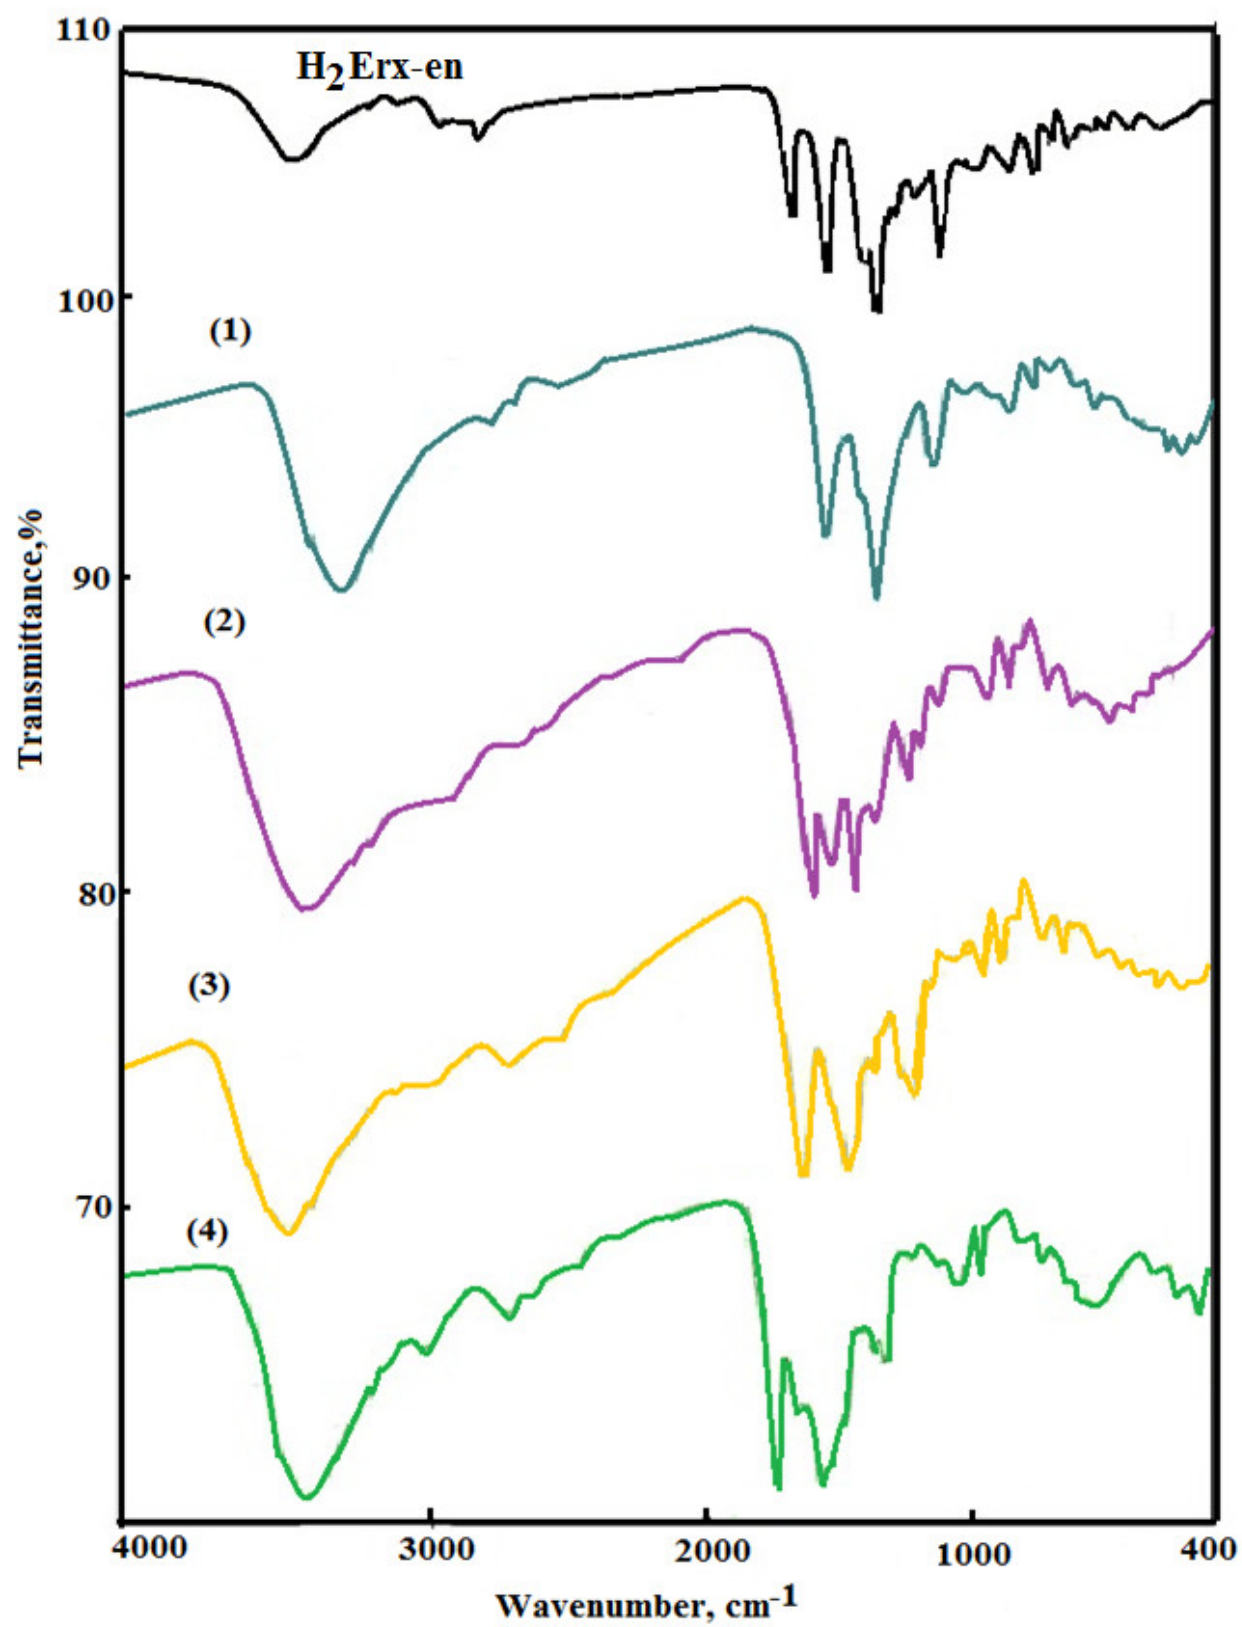

**Figure S1.** Infrared spectra for **H<sub>2</sub>Er<sub>x</sub>-en** and its metal complexes

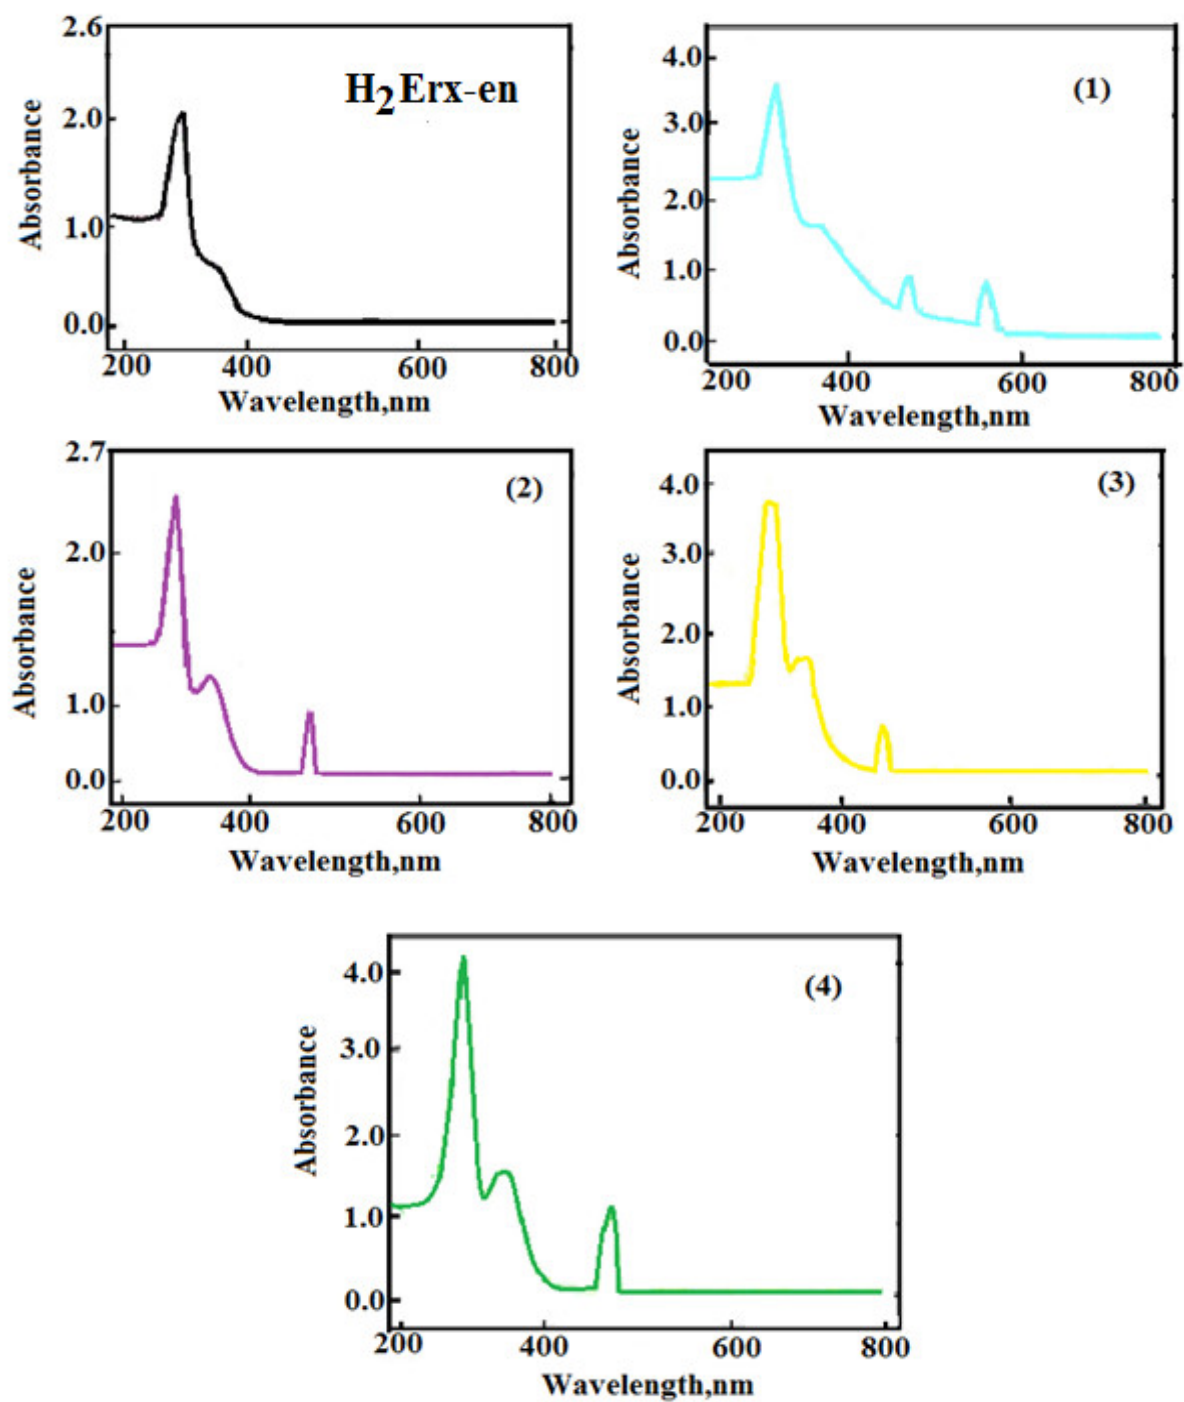

**Figure S2.** Electronic absorption spectra for  $H_2Erx-en$  and its metal complexes

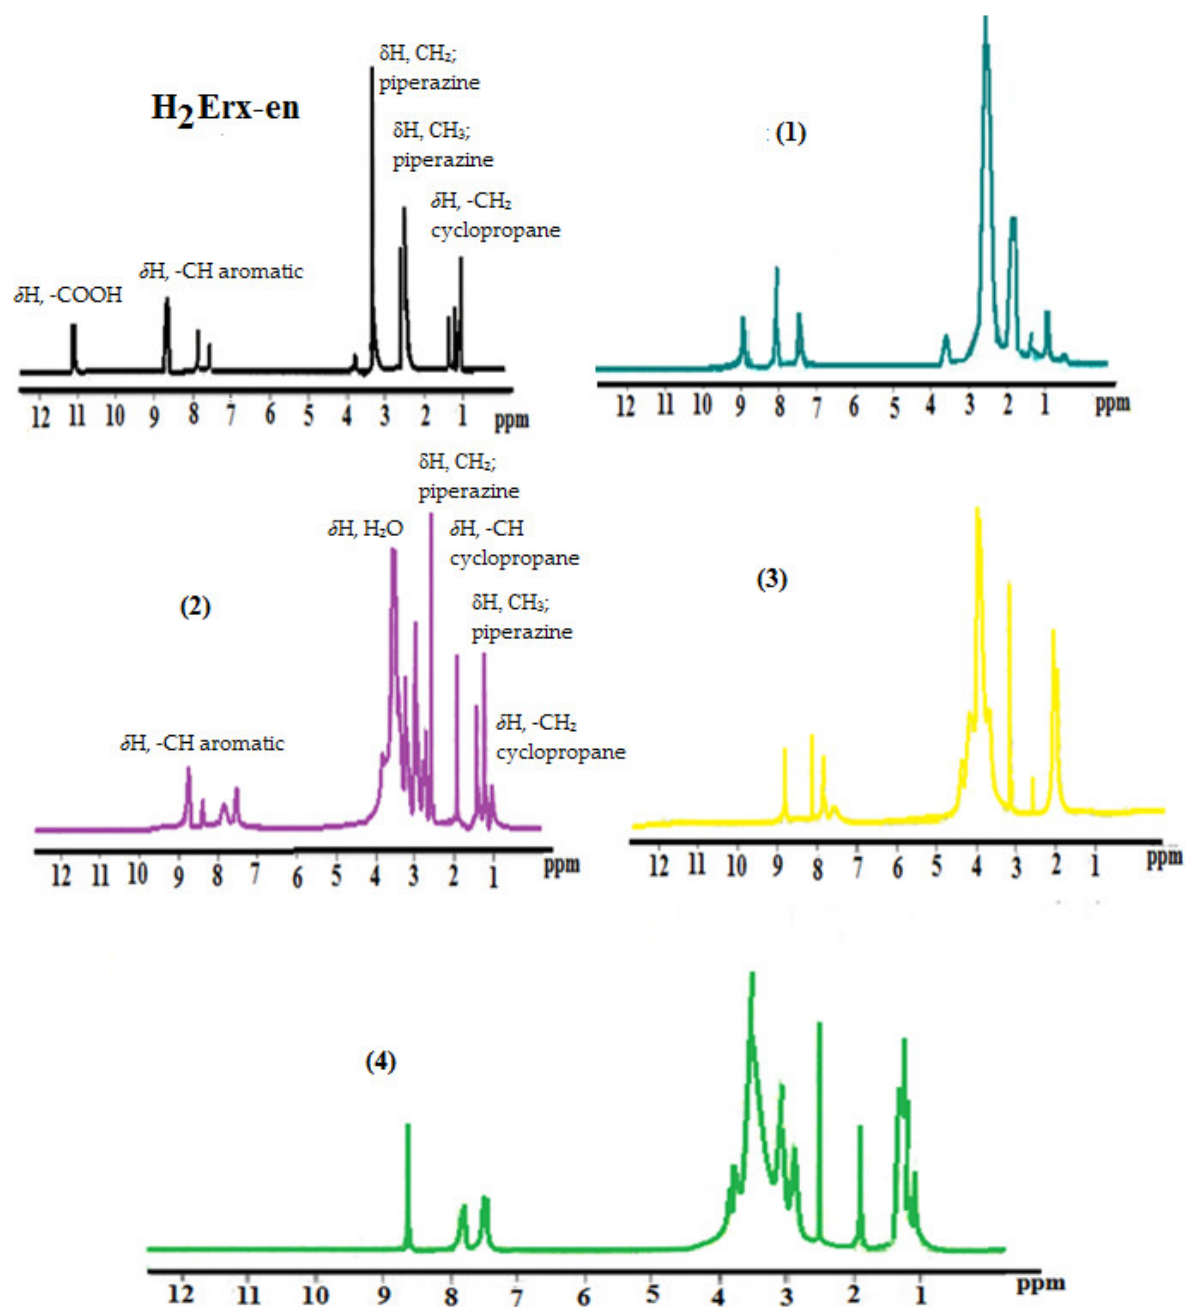

**Figure S3.**  $^1H$  NMR spectra for **H<sub>2</sub>Erx-en** and its metal complexes

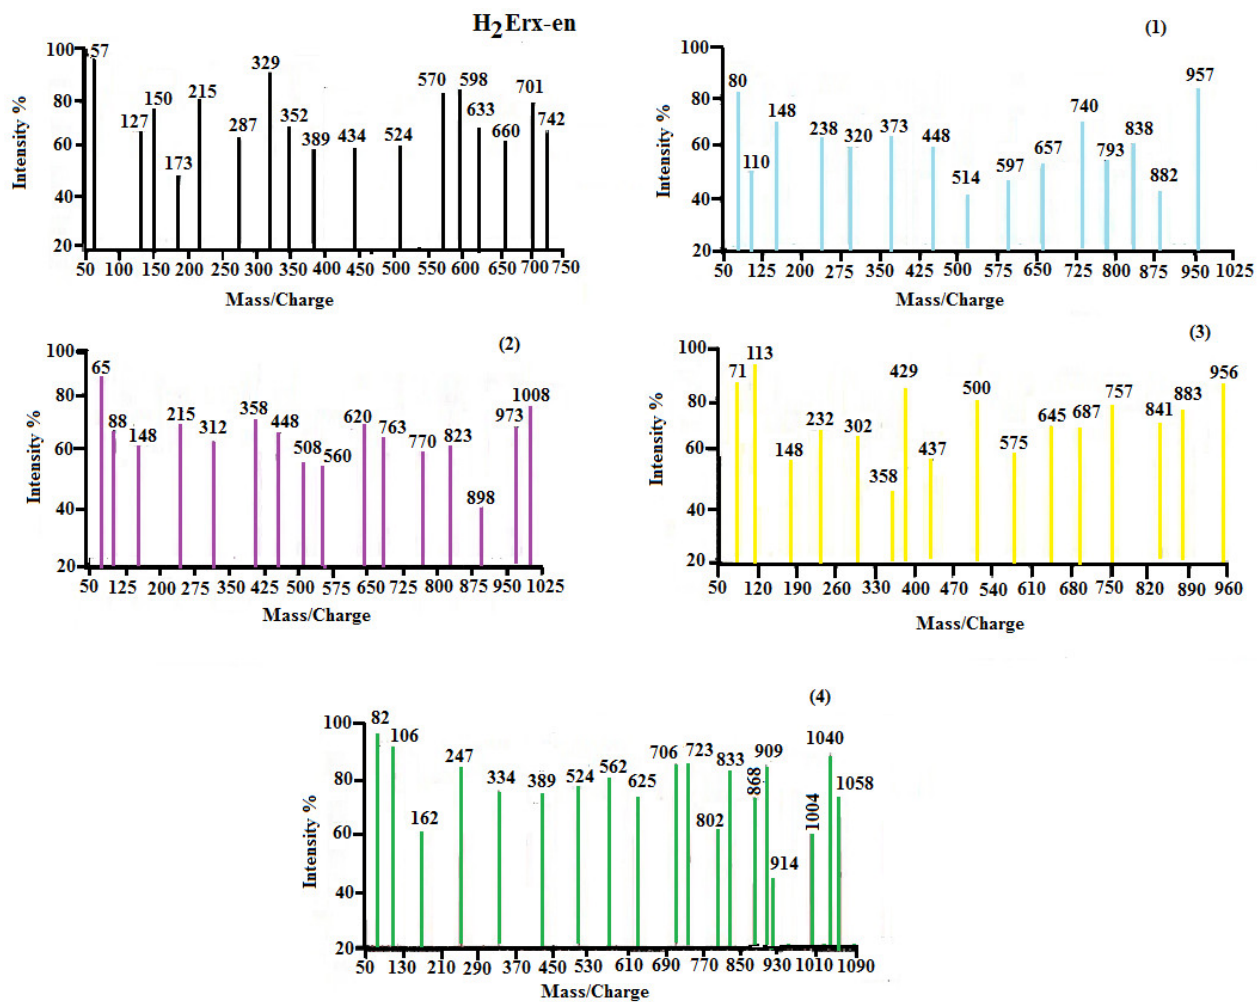

**Figure S4.** Mass spectra diagrams for **H<sub>2</sub>Erx-en** and its metal complexes

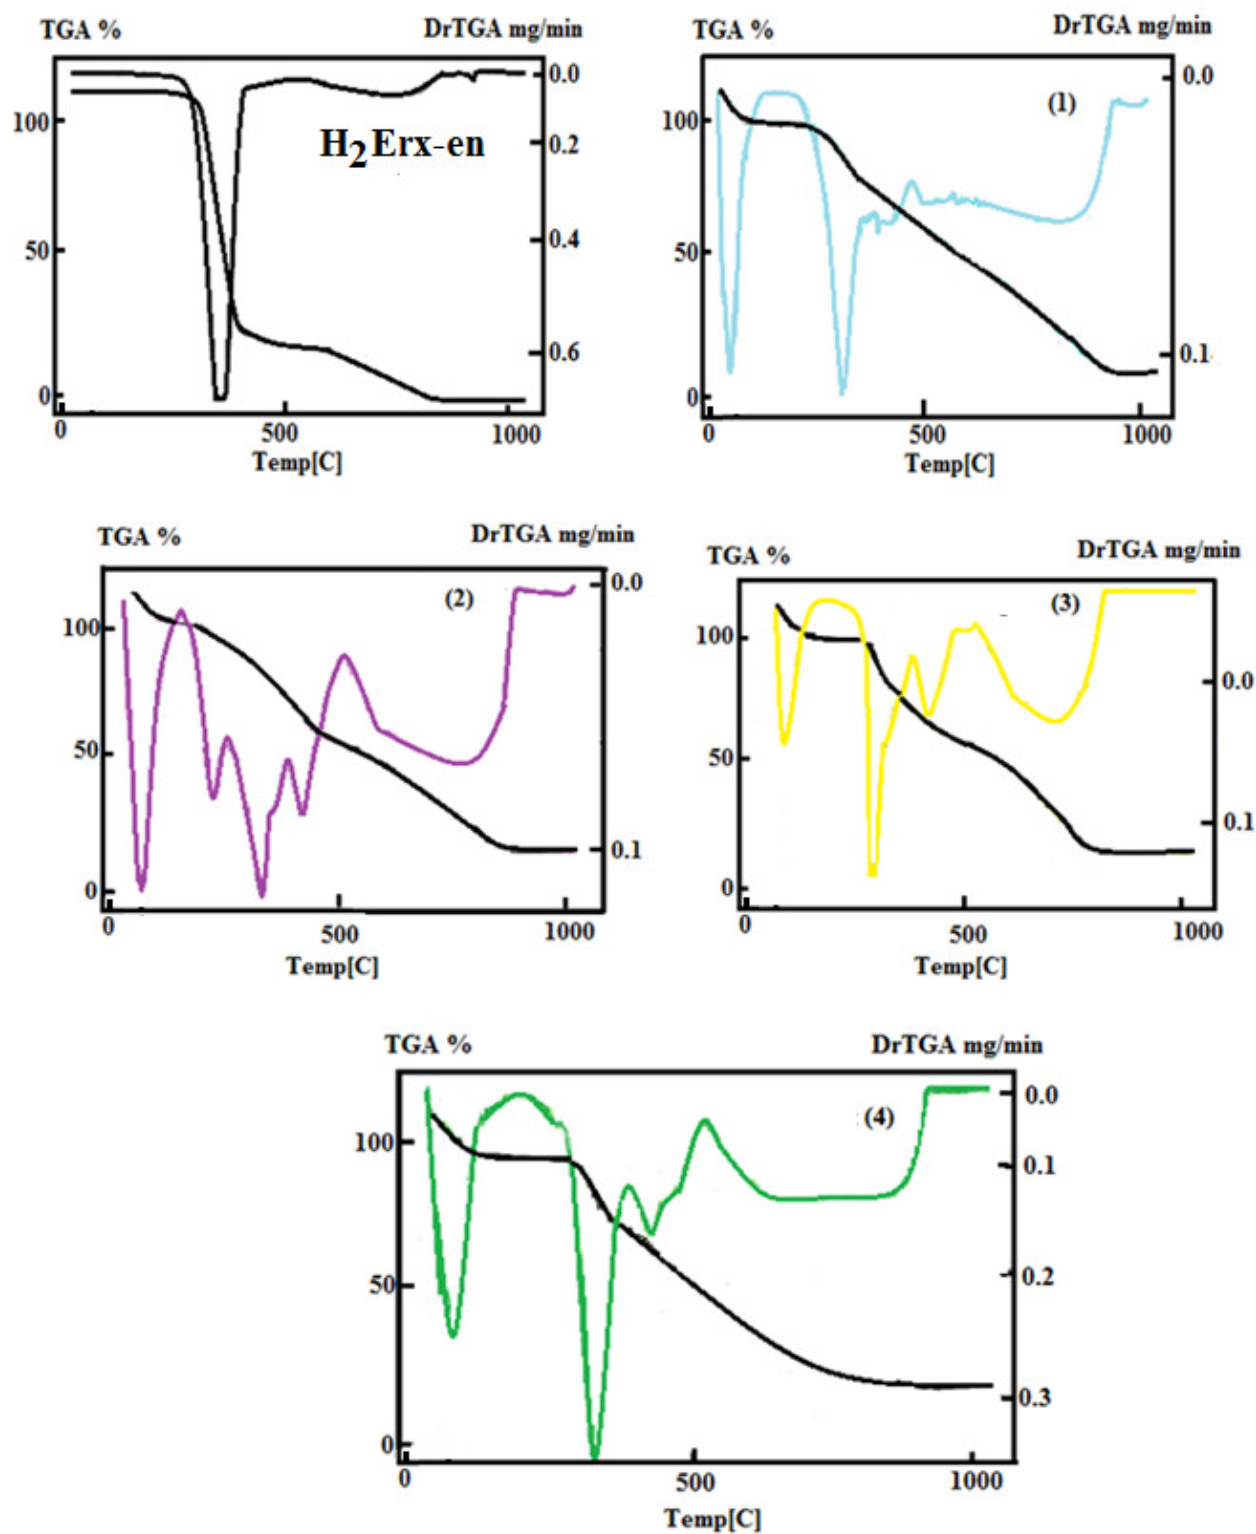

Figure S5. TG and DTG diagrams for  $H_2Erx-en$  and its metal complexes.

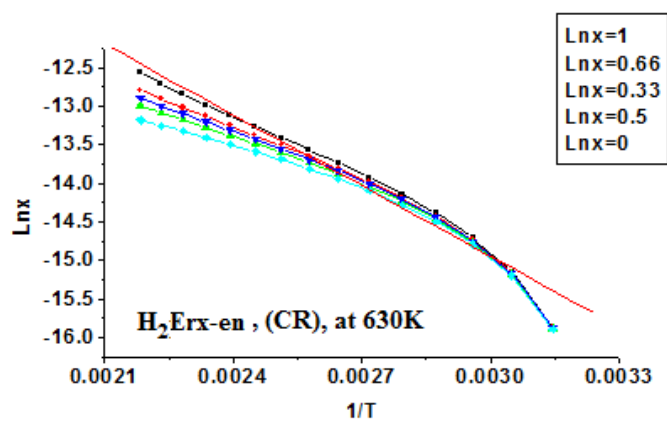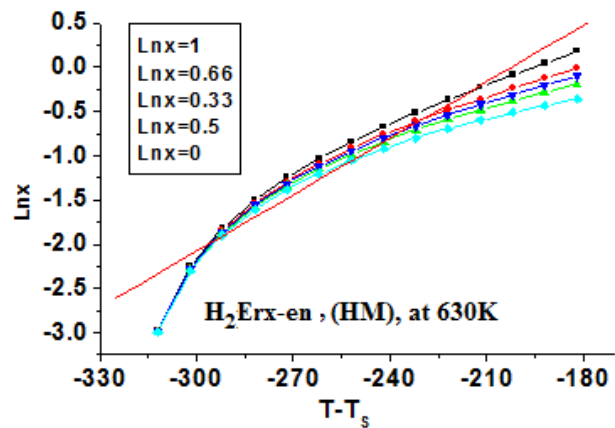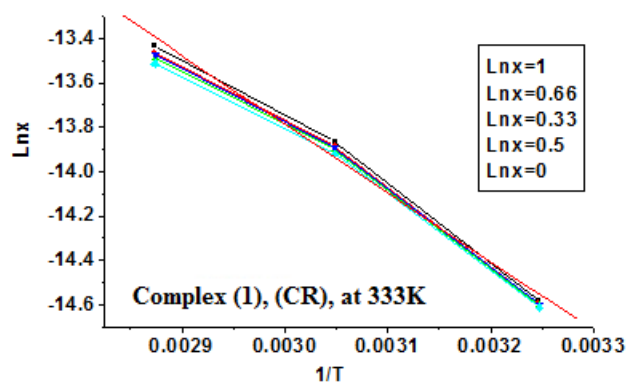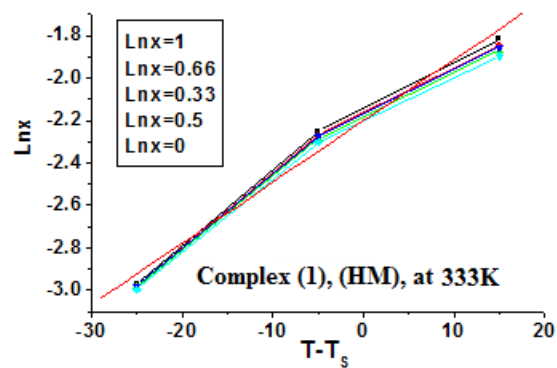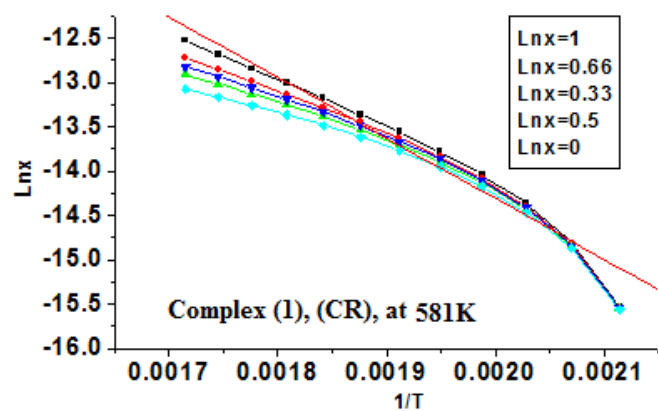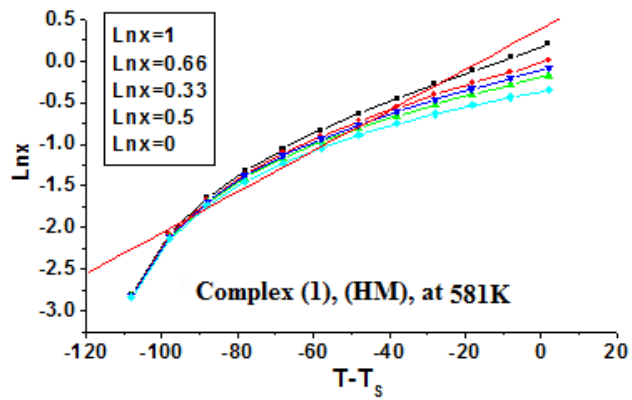

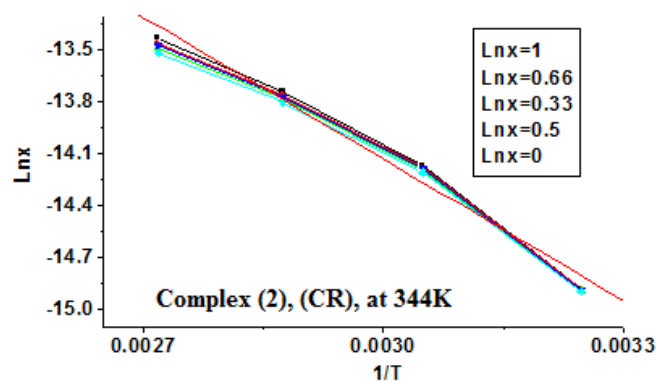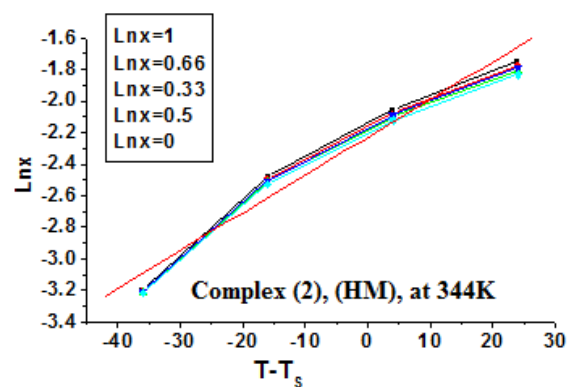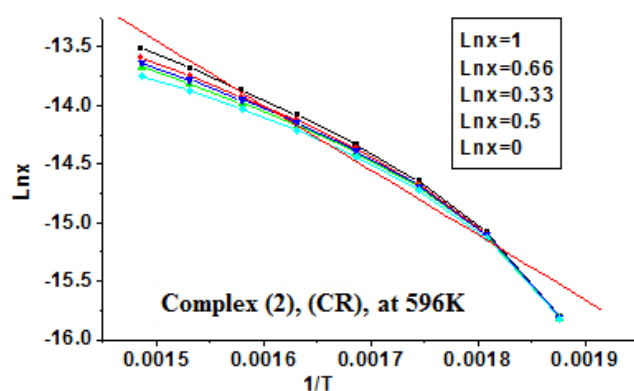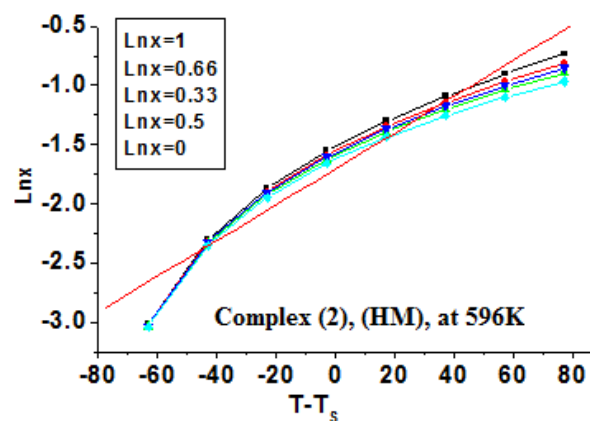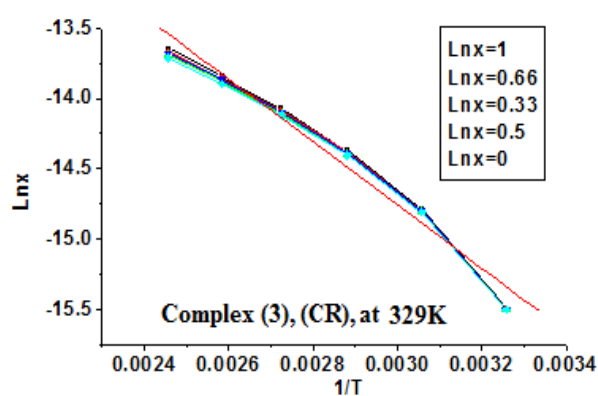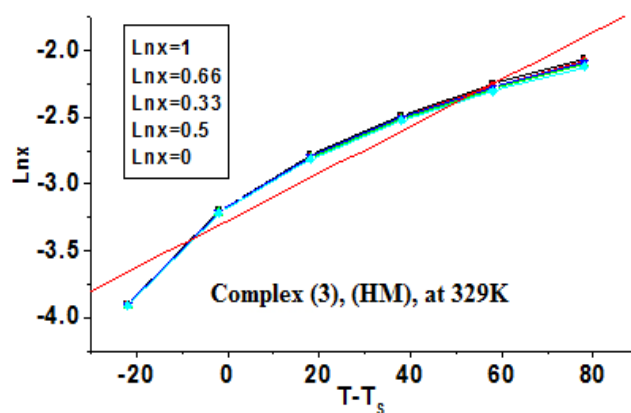



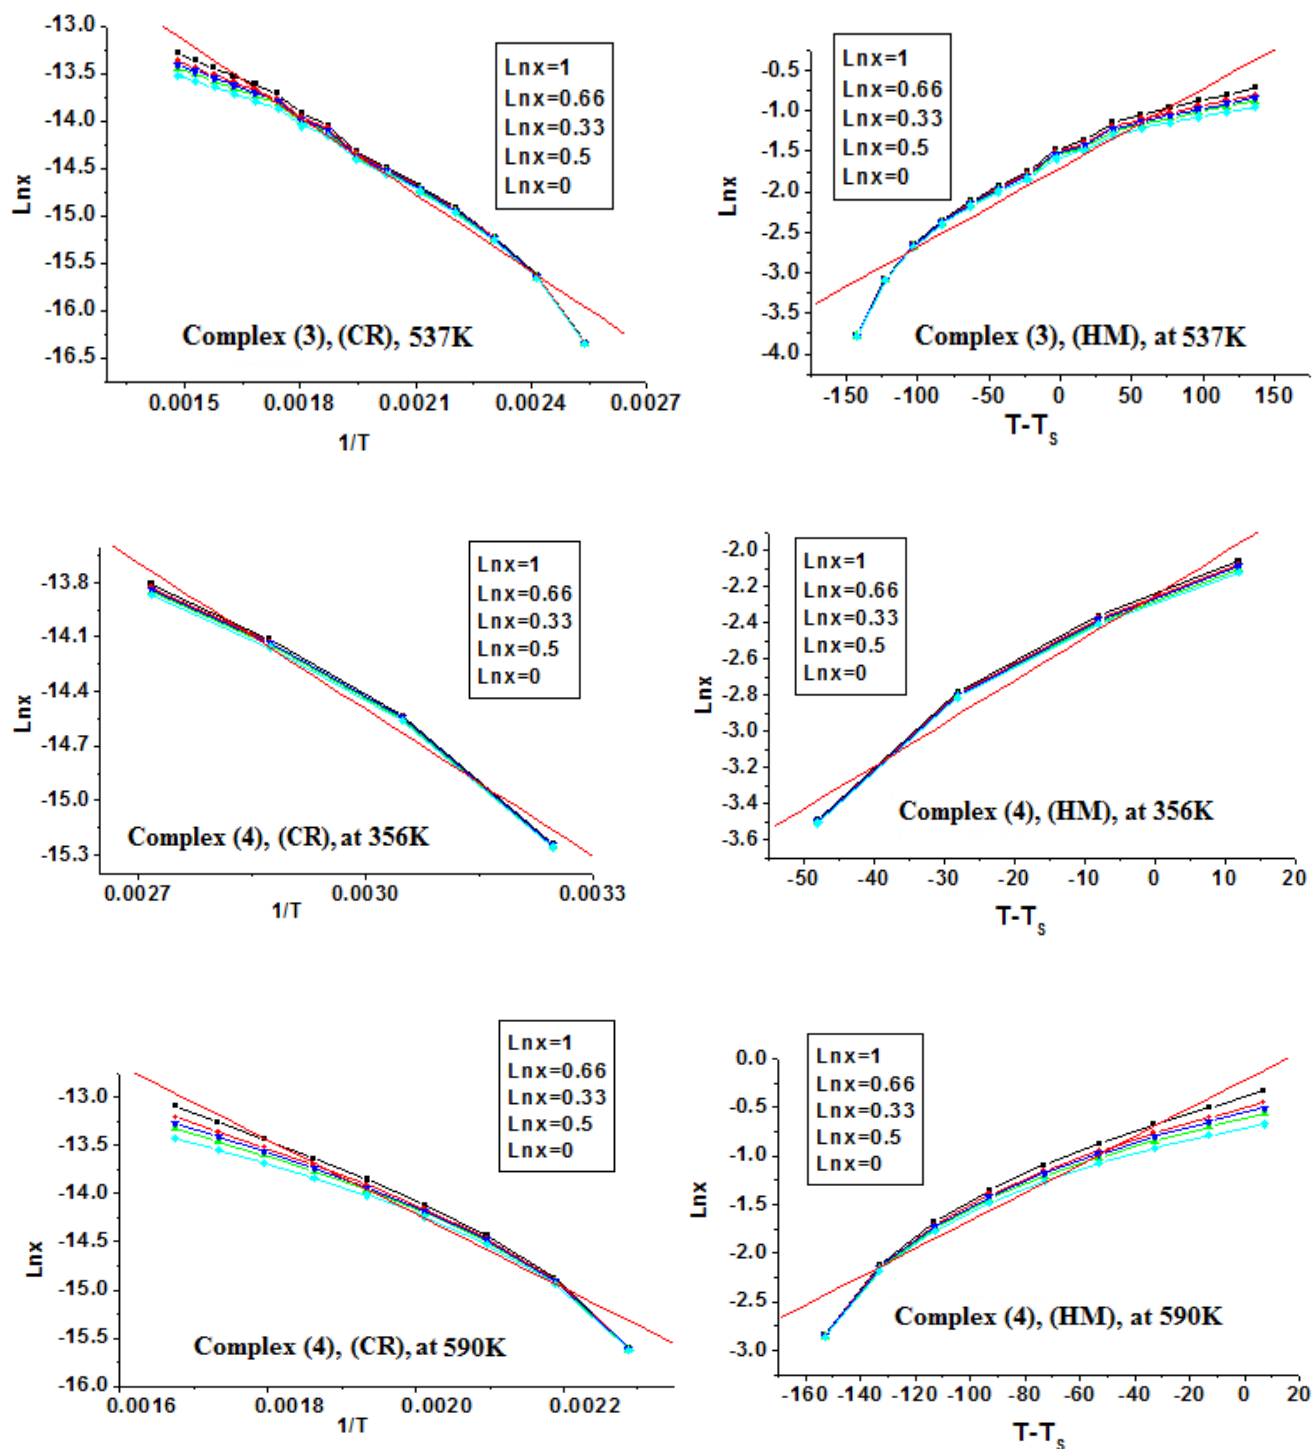

**Figure S6.** The diagrams of kinetic parameters of  $\text{H}_2\text{Er}_x\text{-en}$  and its metal complexes using Coats-Redfern(CR) and Horowitz-Metzger (HM) equations

**Table S1.** The inhibition diameter zone (mm) values for **H<sub>2</sub>Erx-en** and its metal complexes

| Tested compounds           | Microbial species      |     |    |                            |                |       |                            |                |       |                           |                |       |                    |                    |
|----------------------------|------------------------|-----|----|----------------------------|----------------|-------|----------------------------|----------------|-------|---------------------------|----------------|-------|--------------------|--------------------|
|                            | Bacteria               |     |    |                            |                |       |                            |                |       |                           |                | Fungi |                    |                    |
|                            | <i>E. coli</i>         | MIC | AI | <i>Salm. typhi</i>         | MIC            | AI    | <i>S. aureus</i>           | MIC            | AI    | <i>B. cereus</i>          | MIC            | AI    | <i>C. albicans</i> | <i>P. vulpinum</i> |
| <b>H<sub>2</sub>Erx-en</b> | 0                      | 0   | 0  | 30 <sup>+3</sup><br>±1     | 0.75<br>±0.01  | 184.0 | 28.6 <sup>+3</sup><br>±0.8 | 1.00<br>±0.03  | 210.2 | 0                         | 0              | 0     | 0                  | 0                  |
| <b>(1)</b>                 | 0                      | 0   | 0  | 0                          | 0              |       | 31.6 <sup>+3</sup><br>±2   | 0.75<br>±0.03  | 232.3 | 3.3 <sup>+2</sup><br>±0.1 | 0.50<br>±0.007 | 20.2  | 0                  | 0                  |
| <b>(2)</b>                 | 0                      | 0   | 0  | 0                          | 0              | 0     | 33.6 <sup>+3</sup><br>±0.8 | 0.75<br>±0.006 | 247.0 | 0                         | 0              | 0     | 0                  | 0                  |
| <b>(3)</b>                 | 0                      | 0   | 0  | 0                          | 0              | 0     | 27.6 <sup>+3</sup><br>±0.8 | 0.75<br>±0.01  | 202.9 | 0                         | 0              | 0     | 0                  | 0                  |
| <b>(4)</b>                 | 0                      | 0   | 0  | 27.6 <sup>+3</sup><br>±1   | 0.50<br>±0.005 | 169.3 | 0                          | 0              | 0     | 2.3 <sup>+3</sup><br>±0.1 | 0.75<br>±0.03  | 0     | 0                  | 0                  |
| <b>Ciprofloxacin</b>       | 20 <sup>+3</sup><br>±1 | -   |    | 0                          | 0              |       | 13.6 <sup>+3</sup><br>±0.8 |                |       |                           |                |       | 0                  | 0                  |
| <b>Amikacin</b>            | 14 <sup>+3</sup><br>±1 | -   |    | 16.3 <sup>+3</sup><br>±0.3 | -              |       | 8.6 <sup>+3</sup><br>±0.8  | -              |       | 5.3 <sup>+3</sup><br>±0.3 |                |       | 0                  | 0                  |
| <b>Cefuroxime</b>          | 0                      | -   |    | 14 <sup>+3</sup><br>±1     | -              |       | 18.3 <sup>+3</sup><br>±0.8 | -              |       | 0                         |                |       | 0                  | 0                  |
| <b>Cefpodexime</b>         | 0                      | -   |    | 7 <sup>+3</sup><br>±0.5    | -              |       | 19 <sup>+3</sup><br>±1     | -              |       | 0                         |                |       | 0                  | 0                  |
| <b>Ceftazidime</b>         | 0                      | -   |    | 15.3 <sup>+3</sup><br>±2   | -              |       | 3 <sup>+3</sup><br>±0.5    | -              |       | 0                         |                |       | 0                  | 0                  |
| <b>Ethylene diamine</b>    | 0                      | -   |    | 15 <sup>+3</sup><br>±0.5   | -              |       | 0                          | -              | 0     | 0                         |                |       | 0                  | 0                  |
| <b>DMF</b>                 | 0                      | -   |    | 0                          | -              |       | 0                          | -              | 0     | 0                         | -              |       | 0                  | 0                  |

Statistical significance PNS P not significant, P <0.05; P+1 P significant, P>0.05; P+2 P highly significant, P>0.01; P+3 P very highly significant, P>0.001; student's t-test (Paired).

**Table S2.** Equilibrium geometric parameters bond lengths (Å), bond angles (°),dihedral angles (°), total energy (k cal/mol) and dipole moment of **H<sub>2</sub>Erx-en** using DFT calculations.

| Bond length (Å)                                     |         |                 |        |           |       |         |       |
|-----------------------------------------------------|---------|-----------------|--------|-----------|-------|---------|-------|
| C2-C3                                               | 1.343   | N4-C5           | 1.345  | C7-O8     | 1.209 | C13-C14 | 1.346 |
| N1-C2                                               | 1.351   | C5-C6           | 1.346  | C7-O9     | 1.337 | C11-C13 | 1.364 |
| C3-N4                                               | 1.345   | C6-C7           | 1.364  | N1-C14    | 1.348 | C11-O10 | 1.335 |
|                                                     |         |                 |        |           |       | C11-O12 | 1.210 |
| Bond angle (°)                                      |         |                 |        |           |       |         |       |
| N1C2C3                                              | 128.19  | C6C7O8          | 123.05 | C14C13C11 |       | 122.17  |       |
| C2C3N4                                              | 120.99  | C6C7O9          | 121.75 | C13C11O10 |       | 123.89  |       |
| C3N4C5                                              | 121.83  | O8C7O9          | 115.19 | C13C11O12 |       | 120.32  |       |
| N4C5C6                                              | 121.26  | C2N1C14         | 116.47 | O12C11O10 |       | 115.69  |       |
| C5C6C7                                              | 123.58  | N1C14C13        | 120.39 |           |       |         |       |
| Dihedral angles (°) of (H <sub>2</sub> Erx-en)      |         |                 |        |           |       |         |       |
| C5C6C7O9                                            | -179.29 | O8C7C6C5        |        | 1.29      |       |         |       |
| C7C6C5N4                                            | 2.44    | C6C5N4C3        |        | -87.03    |       |         |       |
| C5N4C3C2                                            | -177.92 | N4C3C2N1        |        | -0.344    |       |         |       |
| C3C2N1C14                                           | 3.87    | C2N1C14C13      |        | -94.46    |       |         |       |
| N1C14C13C11                                         | -4.51   | C14C13C11O10    |        | 0.458     |       |         |       |
| C14C13C11O12                                        | -178.89 |                 |        |           |       |         |       |
| Dihedral angles (°) of enrofloxacin molecule (Enro) |         |                 |        |           |       |         |       |
| C8C12C16O17                                         | -4.02   | C6N9C13C14      |        | 126.91    |       |         |       |
| C21N20C1C4                                          | -81.72  | C6N9C13C15      |        | 61.16     |       |         |       |
| C4C1N20C25                                          | 90.62   | C10C12C16O18    |        | 0.25      |       |         |       |
| C1N20C25C24                                         | 136.88  | C10C12C16O17    |        | -179.55   |       |         |       |
| N20C25C24N23                                        | 49.68   | O11C8C12C16     |        | 7.46      |       |         |       |
| C25C24N23C26                                        | 87.48   | C27C26N23C24    |        | -81.48    |       |         |       |
| Total energy/ k cal/mol                             |         | -311211.5866330 |        |           |       |         |       |
| Total dipole moment/D                               |         | 10.56           |        |           |       |         |       |

**Table S3.** Equilibrium geometric parameters bond lengths (Å), bond angles (°),dihedral angles (°), Total energy (k cal/mol) and Dipole moment of the studied complexes using DFT calculations.

| Bond lengths/ Å         | (1)         | (2)         | (3)         | (4)         |
|-------------------------|-------------|-------------|-------------|-------------|
| M-N1                    | 1.982       | 2.595       | 2.315       | 2.751       |
| M-O10                   | 1.930       | 2.393       | 2.193       | 2.439       |
| M-N4                    | 1.973       | 2.607       | 2.318       | 2.753       |
| M-O9                    | 1.935       | 2.406       | 2.207       | 2.499       |
| M-O15                   | 1.999       | 2.357       | 2.139       | 2.448       |
| M-O16                   | 2.111       | 2.361       | 2.097       | 2.455       |
| N1-C2                   | 1.265       | 1.269       | 1.271       | 1.269       |
| C2-C3                   | 1.346       | 1.343       | 1.344       | 1.345       |
| C3-N4                   | 1.269       | 1.268       | 1.270       | 1.269       |
| N1-C14                  | 1.276       | 1.280       | 1.279       | 1.281       |
| C13-C14                 | 1.357       | 1.358       | 1.356       | 1.359       |
| C11-C13                 | 1.362       | 1.363       | 1.361       | 1.364       |
| C11-O10                 | 1.346       | 1.342       | 1.343       | 1.345       |
| C11-O12                 | 1.209       | 1.211       | 1.210       | 1.212       |
| N4-C5                   | 1.275       | 1.281       | 1.279       | 1.280       |
| C5-C6                   | 1.355       | 1.357       | 1.356       | 1.359       |
| C6-O7                   | 1.363       | 1.361       | 1.362       | 1.360       |
| C7-O9                   | 1.342       | 1.341       | 1.343       | 1.342       |
| C7-O8                   | 1.211       | 1.210       | 1.212       | 1.211       |
| N1-M-N4                 | 79.71       | 70.37       | 74.87       | 69.54       |
| N1-M-O9                 | 166.07      | 129.83      | 130.34      | 132.79      |
| N1-M-O10                | 85.54       | 75.96       | 81.83       | 73.03       |
| N1-M-O15                | 100.54      | 150.98      | 83.21       | 130.21      |
| N1-M-O16                | 105.69      | 78.94       | 145.39      | 92.21       |
| N4-M-O9                 | 96.34       | 75.37       | 79.53       | 74.76       |
| N4-M-O10                | 113.26      | 130.03      | 139.28      | 127.97      |
| N4-M-O15                | 157.17      | 134.35      | 89.78       | 151.68      |
| N4-M-O16                | 81.26       | 119.24      | 133.31      | 82.59       |
| O9-M-O10                | 83.72       | 101.02      | 91.32       | 108.73      |
| O9-M-O15                | 88.32       | 77.57       | 138.75      | 95.18       |
| O9-M-O16                | 86.79       | 151.06      | 80.73       | 112.81      |
| O10-M-O15               | 89.43       | 90.77       | 120.35      | 80.23       |
| O10-M-O16               | 163.41      | 88.09       | 82.79       | 133.92      |
| O15-M-O16               | 76.69       | 74.88       | 78.20       | 77.09       |
| Total energy, k cal/mol | -347128.827 | -333986.825 | -333922.301 | -335273.485 |
| Dipole moment, D        | 12.852      | 14.597      | 22.480      | 13.286      |

**Table S4.** Calculated charges on donating sites and energy values (HOMO, LUMO, Energy gap  $\Delta E$ /eV, hardness ( $\eta$ ), global softness (S), electro negativity ( $\chi$ ), absolute softness ( $\sigma$ ), chemical potential (Pi), global electrophilicity ( $\omega$ ) and additional electronic charge ( $\Delta N_{\max}$ ) of H<sub>2</sub>Er<sub>x</sub>-en and its metal complexes using DFT calculation

| Parameters                    | H <sub>2</sub> Er <sub>x</sub> -en | (1)     | (2)     | (3)     | (4)     |
|-------------------------------|------------------------------------|---------|---------|---------|---------|
| M                             | -                                  | 0.089   | 0.448   | 0.307   | 0.406   |
| N1                            | -0.285                             | -0.094  | -0.172  | -0.143  | -0.173  |
| N4                            | -0.087                             | -0.116  | -0.175  | -0.154  | -0.187  |
| O9                            | -0.362                             | -0.450  | -0.433  | -0.373  | -0.422  |
| O10                           | -0.391                             | -0.445  | -0.417  | -0.379  | -0.426  |
| O15                           | -                                  | -0.326  | -0.299  | -0.531  | -0.335  |
| O16                           | -                                  | -0.332  | -0.324  | -0.305  | -0.313  |
| C2                            | 0.165                              | 0.086   | 0.017   | 0.018   | 0.007   |
| C3                            | -0.043                             | 0.066   | 0.021   | 0.037   | 0.039   |
| C5                            | -0.120                             | 0.228   | 0.255   | 0.248   | 0.267   |
| C6                            | -0.057                             | -0.153  | -0.186  | -0.172  | -0.183  |
| C7                            | 0.482                              | 0.472   | 0.489   | 0.493   | 0.492   |
| O8                            | -0.454                             | -0.450  | -0.464  | -0.461  | -0.443  |
| C14                           | 0.302                              | 0.249   | 0.253   | 0.239   | 0.250   |
| C13                           | -0.146                             | -0.136  | -0.183  | -0.167  | -0.195  |
| C11                           | 0.517                              | 0.483   | 0.491   | 0.498   | 0.481   |
| O12                           | -0.429                             | -0.451  | -0.456  | -0.456  | -0.446  |
| HOMO,H                        | -0.308                             | -0.309  | -0.310  | -0.311  | -0.315  |
| LUMO,L                        | -0.245                             | -0.297  | -0.289  | -0.302  | -0.310  |
| I = -H                        | 0.308                              | 0.309   | 0.310   | 0.311   | 0.315   |
| A = -L                        | 0.245                              | 0.297   | 0.289   | 0.302   | 0.310   |
| $\Delta E = L-H$              | 0.063                              | 0.012   | 0.021   | 0.009   | 0.005   |
| $\eta = (I-A)/2$              | 0.0315                             | 0.006   | 0.0105  | 0.0045  | 0.0025  |
| $\chi = -(H+L)/2$             | 0.2765                             | 0.303   | 0.2995  | 0.3065  | 0.3125  |
| $\sigma = 1/\eta$             | 31.476                             | 166.667 | 95.238  | 222.22  | 400.00  |
| $S = 1/2 \eta$                | 15.873                             | 83.333  | 47.619  | 111.11  | 200.00  |
| Pi = - $\chi$                 | -0.2765                            | -0.303  | -0.2995 | -0.3065 | -0.3125 |
| $\omega = (Pi)^2/2 \eta$      | 1.2135                             | 7.651   | 4.271   | 10.438  | 19.531  |
| $\Delta N_{\max} = \chi/\eta$ | 8.778                              | 50.5    | 28.524  | 68.111  | 125.00  |

( I ) is ionization energy, ( A ) is an electron affinity

**Table S5.** Composition of the frontier molecular orbital for the obtained stable complexes using DFT/B3LYP/Cep-31G.

|                        | <b>(1)</b> |      |                        | <b>(2)</b> |       |
|------------------------|------------|------|------------------------|------------|-------|
|                        | H          | L    |                        | H          | L     |
| <b>Fe(III)</b>         | 0.3%       | 0.0% | <b>Y(III)</b>          | 0.0%       | 0.0%  |
| <b>Enerofloxacin</b>   | 99.7%      | 100% | <b>Enerofloxacin</b>   | 100%       | 72.4% |
| <b>ethylenediamine</b> | 0.0%       | 0.0% | <b>ethylenediamine</b> | 0.0%       | 27.6% |
| <b>O15</b>             | 0.0%       | 0.0% | <b>O15</b>             | 0.0%       | 0.0%  |
| <b>O16</b>             | 0.0%       | 0.0% | <b>O16</b>             | 0.0%       | 0.0%  |
|                        | <b>(3)</b> |      |                        | <b>(4)</b> |       |
|                        | H          | L    |                        | H          | L     |
| <b>Zr(IV)</b>          | 0.0%       | 0.0% | <b>La(III)</b>         | 0.0%       | 66.8% |
| <b>Enerofloxacin</b>   | 100%       | 100% | <b>Enerofloxacin</b>   | 100%       | 10.4% |
| <b>ethylenediamine</b> | 0.0%       | 0.0% | <b>ethylenediamine</b> | 0.0%       | 22.8% |
| <b>O15</b>             | 0.0%       | 0.0% | <b>O15</b>             | 0.0%       | 0.0%  |
| <b>O16</b>             | 0.0%       | 0.0% | <b>O16</b>             | 0.0%       | 0.0%  |

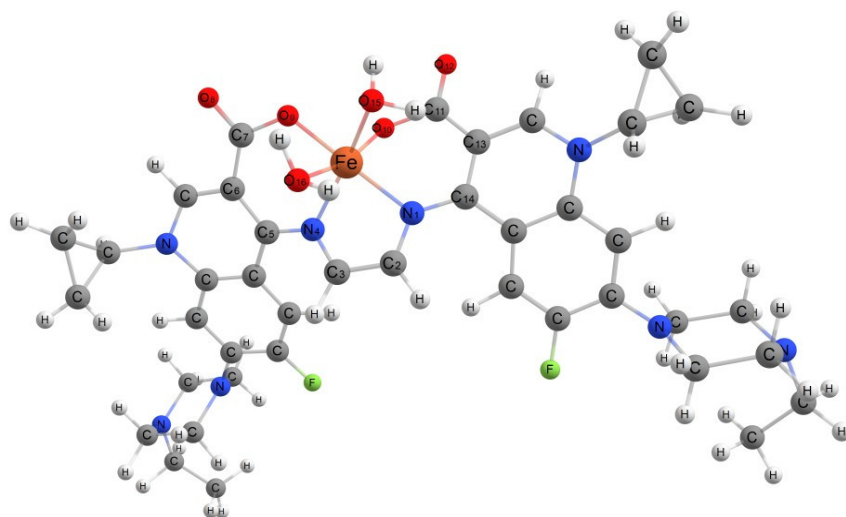

**Scheme S1.** Optimized geometrical structure of complex **(1)** using DFT calculations.

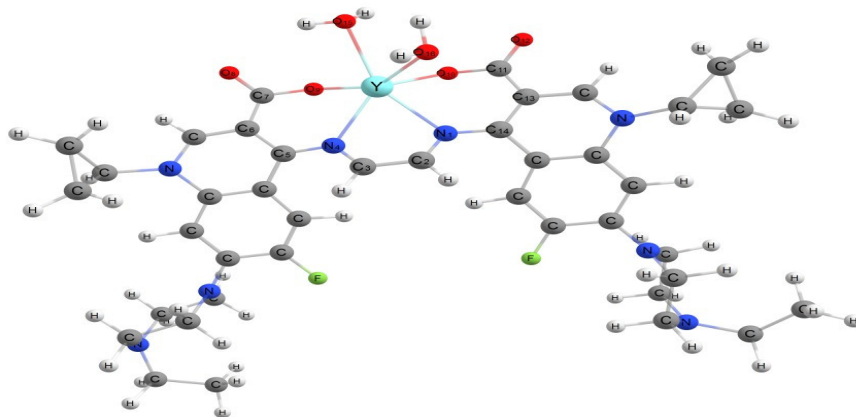

**Scheme S2.** Optimized geometrical structure of complex **(2)** using DFT calculations.



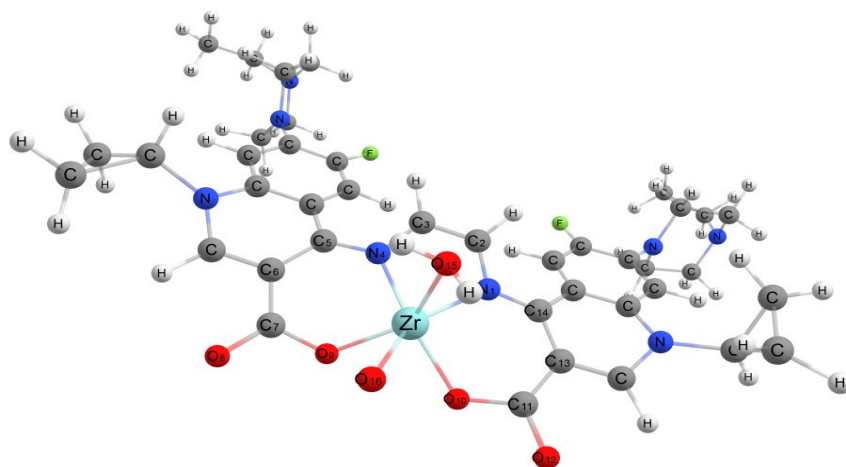

**Scheme S3.** Optimized geometrical structure of complex **(3)** using DFT calculations.

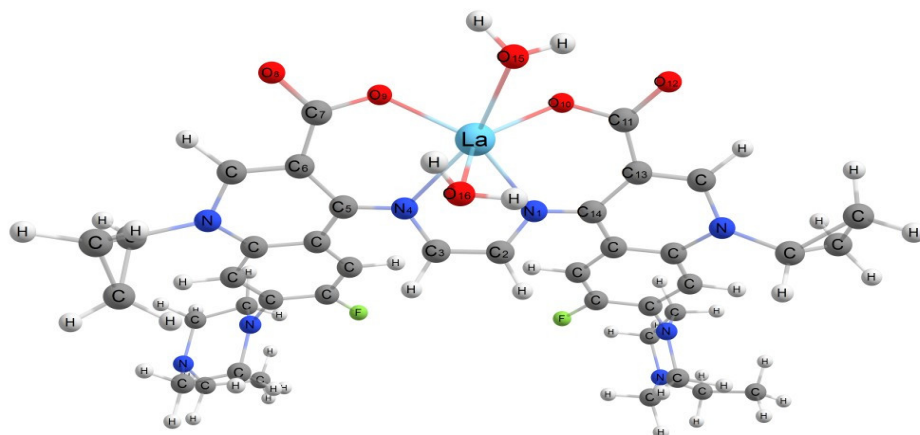

**Scheme S4.** Optimized geometrical structure of complex **(4)** using DFT calculations.
